# Supplementary material for: Safety and Efficacy of Sitagliptin Therapy for the Inpatient Management of General Medicine and Surgery Patients With Type 2 Diabetes: A pilot, randomized, controlled study
Source: PubMed Central journal article supplement — Diabetes Care. 2013 Oct 15;36(11):3430–5. doi: 10.2337/dc13-0277 (PMC3816910; doi:10.2337/dc13-0277), 2013-10-15

## SUPPLEMENTARY DATA

### Supplementary Table 1. Insulin Treatment Protocols:

#### 1.A. Sitagliptin Group

|                                                                                                                                                                                                                                                                            |
|----------------------------------------------------------------------------------------------------------------------------------------------------------------------------------------------------------------------------------------------------------------------------|
| Discontinue oral antidiabetic drugs or low-dose insulin on admission.                                                                                                                                                                                                      |
| Sitagliptin once daily - Dosage                                                                                                                                                                                                                                            |
| <ul style="list-style-type: none"><li>• 100 mg/day (at any time of day) for patients with GFR 50–100 ml/min</li><li>• 50 mg/day for patients with GFR 30–50 ml/min</li></ul>                                                                                               |
| Supplemental (correction) insulin:                                                                                                                                                                                                                                         |
| <ul style="list-style-type: none"><li>• Give supplemental insulin lispro following the “sliding scale” protocol (1D) for blood glucose &gt; 140 mg/dl.</li></ul>                                                                                                           |
| <ul style="list-style-type: none"><li>• If a patient is able and expected to eat all, give supplemental lispro insulin before each meal and at bedtime following the “usual” column.</li></ul>                                                                             |
| <ul style="list-style-type: none"><li>• If a patient is not able to eat, give supplemental lispro insulin every 6 hours (6-12-6-12) following the “sensitive” column.</li></ul>                                                                                            |
| Insulin adjustment:                                                                                                                                                                                                                                                        |
| <ul style="list-style-type: none"><li>• If the fasting and pre-meal plasma glucose are persistently &gt;140 mg/dl in the absence of hypoglycemia, the insulin scale of lispro insulin could be increased from sensitive to usual, or to usual to resistant scale</li></ul> |
| <ul style="list-style-type: none"><li>• If a patient develops hypoglycemia, the sliding scale of lispro insulin should be decreased from insulin resistant to usual scale or from usual to sensitive scale.</li></ul>                                                      |
| Blood glucose monitoring:                                                                                                                                                                                                                                                  |
| <ul style="list-style-type: none"><li>• Measure BG before each meal and at bedtime (or every 6 hours if a patient is not eating) using a glucose meter. In addition, measure BG at any time if a patient experiences symptoms of hypoglycemia.</li></ul>                   |

## SUPPLEMENTARY DATA

### 1.B. Sitagliptin plus Glargine Group.

|                                                                                                                                                                                                                                                                                                                                                                                                                                                                                                                                                                                                                                                   |
|---------------------------------------------------------------------------------------------------------------------------------------------------------------------------------------------------------------------------------------------------------------------------------------------------------------------------------------------------------------------------------------------------------------------------------------------------------------------------------------------------------------------------------------------------------------------------------------------------------------------------------------------------|
| Discontinue oral antidiabetic drugs or low-dose insulin on admission.                                                                                                                                                                                                                                                                                                                                                                                                                                                                                                                                                                             |
| Sitagliptin once daily - Dosage                                                                                                                                                                                                                                                                                                                                                                                                                                                                                                                                                                                                                   |
| <ul style="list-style-type: none"> <li>• 100 mg/day (at any time of day) for patients with GFR 50–100 ml/min</li> <li>• 50 mg/day for patients with GFR 30–50 ml/min</li> </ul>                                                                                                                                                                                                                                                                                                                                                                                                                                                                   |
| Glargine once daily - starting daily dose:                                                                                                                                                                                                                                                                                                                                                                                                                                                                                                                                                                                                        |
| <ul style="list-style-type: none"> <li>• Patients with BG between 140-200 mg/dL= 0.2 units per kg weight per day.</li> <li>• Patients with BG between 201-400 mg/dL= 0.25 units per kg weight per day.</li> <li>• Glargine insulin will be given once daily, at the same time of the day.</li> <li>• Patients will receive the full-dose of glargine insulin (even if NPO) except for those that have GFR &lt;50 ml/min. Patients with GFR &lt;50ml/min will receive only ½ of the calculated insulin dose.</li> </ul>                                                                                                                            |
| Supplemental (correction) insulin:                                                                                                                                                                                                                                                                                                                                                                                                                                                                                                                                                                                                                |
| <ul style="list-style-type: none"> <li>• Give supplemental insulin lispro following the “sliding scale” protocol (1D) for blood glucose &gt; 140 mg/dl.</li> <li>• If a patient is able and expected to eat all, give supplemental lispro insulin before each meal and at bedtime following the “usual” column.</li> <li>• If a patient is not able to eat, give supplemental lispro insulin every 6 hours (6-12-6-12) following the “sensitive” column.</li> </ul>                                                                                                                                                                               |
| Daily insulin adjustment:                                                                                                                                                                                                                                                                                                                                                                                                                                                                                                                                                                                                                         |
| <ul style="list-style-type: none"> <li>• Fasting and pre-meal BG between 100-140 mg/dl without hypoglycemia the previous day: no change</li> <li>• Fasting and pre-meal BG between 141-180 mg/dl: increase glargine dose by 10% every day</li> <li>• Fasting and pre-meal BG &gt;180 mg/dl: increase glargine dose by 20% every day</li> <li>• Fasting and pre-meal BG between 70-99 mg/dl: decrease glargine dose by 10% every day</li> <li>• If a patient develops hypoglycemia (BG &lt;70 mg/dL), decrease glargine dose by 20%.</li> <li>• If a patient develops hypoglycemia (BG &lt;40 mg/dL), decrease glargine dose by 30-40%.</li> </ul> |
| Blood glucose monitoring:                                                                                                                                                                                                                                                                                                                                                                                                                                                                                                                                                                                                                         |
| <ul style="list-style-type: none"> <li>• Measure BG before each meal and at bedtime (or every 6 hours if a patient is not eating) using a glucose meter. In addition, measure BG at any time if a patient experiences symptoms of hypoglycemia.</li> </ul>                                                                                                                                                                                                                                                                                                                                                                                        |

## SUPPLEMENTARY DATA

### 1.C. Basal Bolus Insulin Regimen

|                                                                                                                                                                                                                                                                                                                                  |
|----------------------------------------------------------------------------------------------------------------------------------------------------------------------------------------------------------------------------------------------------------------------------------------------------------------------------------|
| Discontinue oral antidiabetic drugs or low-dose insulin on admission.                                                                                                                                                                                                                                                            |
| Starting total daily insulin dose:                                                                                                                                                                                                                                                                                               |
| <ul style="list-style-type: none"><li>• Patients with BG between 140-200 mg/dL= 0.4 units per kg weight per day.</li></ul>                                                                                                                                                                                                       |
| <ul style="list-style-type: none"><li>• Patients with BG between 201-400 mg/dL= 0.5 units per kg weight per day.</li></ul>                                                                                                                                                                                                       |
| <ul style="list-style-type: none"><li>• Half of total daily dose will be given as glargine and half as lispro/aspart.</li></ul>                                                                                                                                                                                                  |
| <ul style="list-style-type: none"><li>• Glargine insulin will be given once daily, at the same time of the day. Patients will receive the full-dose of glargine insulin (even if NPO) except for those that have GFR &lt;50 ml/min. Patients with GFR &lt;50ml/min will receive only ½ of the calculated insulin dose.</li></ul> |
| <ul style="list-style-type: none"><li>• Insulin lispro will be given in three equally divided doses before each meal. To prevent hypoglycemia, if a subject is not able to eat, the dose of lispro will be held. Patients with GFR &lt;50ml/min receive ½ of the calculated insulin dose.</li></ul>                              |
| Daily insulin adjustment:                                                                                                                                                                                                                                                                                                        |
| <ul style="list-style-type: none"><li>• Fasting and pre-meal BG between 100-140 mg/dl without hypoglycemia the previous day: no change</li></ul>                                                                                                                                                                                 |
| <ul style="list-style-type: none"><li>• Fasting and pre-meal BG between 141-180 mg/dl: increase glargine dose by 10% every day</li></ul>                                                                                                                                                                                         |
| <ul style="list-style-type: none"><li>• Fasting and pre-meal BG &gt;180 mg/dl: increase glargine dose by 20% every day</li></ul>                                                                                                                                                                                                 |
| <ul style="list-style-type: none"><li>• Fasting and pre-meal BG between 70-99 mg/dl: decrease glargine dose by 10% every day</li></ul>                                                                                                                                                                                           |
| <ul style="list-style-type: none"><li>• If a patient develops hypoglycemia (BG &lt;70 mg/dL), decrease glargine dose by 20%.</li></ul>                                                                                                                                                                                           |
| <ul style="list-style-type: none"><li>• If a patient develops hypoglycemia (BG &lt;40 mg/dL), decrease glargine dose by 30-40%.</li></ul>                                                                                                                                                                                        |
| Supplemental (correction) insulin:                                                                                                                                                                                                                                                                                               |
| <ul style="list-style-type: none"><li>• Give supplemental insulin lispro following the “sliding scale” protocol (1D) for blood glucose &gt; 140 mg/dl.</li></ul>                                                                                                                                                                 |
| <ul style="list-style-type: none"><li>• If a patient is able and expected to eat all, give supplemental lispro insulin before each meal and at bedtime following the “usual” column.</li></ul>                                                                                                                                   |
| <ul style="list-style-type: none"><li>• If a patient is not able to eat, give supplemental lispro insulin every 6 hours (6-12-6-12) following the “sensitive” column.</li></ul>                                                                                                                                                  |
|                                                                                                                                                                                                                                                                                                                                  |
| Blood glucose monitoring:                                                                                                                                                                                                                                                                                                        |
| <ul style="list-style-type: none"><li>• Measure BG before each meal and at bedtime (or every 6 hours if a patient is not eating) using a glucose meter. In addition, measure BG at any time if a patient experiences symptoms of hypoglycemia.</li></ul>                                                                         |

SUPPLEMENTARY DATA

**1.D. Supplemental Lispro Insulin Scale**

|                       | <input type="checkbox"/> | <input type="checkbox"/> | <input type="checkbox"/> |
|-----------------------|--------------------------|--------------------------|--------------------------|
| Blood Glucose (mg/dL) | Insulin Sensitive        | Usual                    | Insulin Resistant        |
| >141-180              | 2                        | 4                        | 6                        |
| 181-220               | 4                        | 6                        | 8                        |
| 221-260               | 6                        | 8                        | 10                       |
| 261-300               | 8                        | 10                       | 12                       |
| 301-350               | 10                       | 12                       | 14                       |
| 351-400               | 12                       | 14                       | 16                       |
| > 400                 | 14                       | 16                       | 18                       |

\*\* Check appropriate column below and cross out other columns

SUPPLEMENTARY DATA

**Supplementary Figure 1.** Mean daily glucose concentration in patients with randomization BG <180 mg/dl (1A) and BG ≥180 mg/dl (1B) treated with sitagliptin, sitagliptin plus basal insulin and basal bolus.

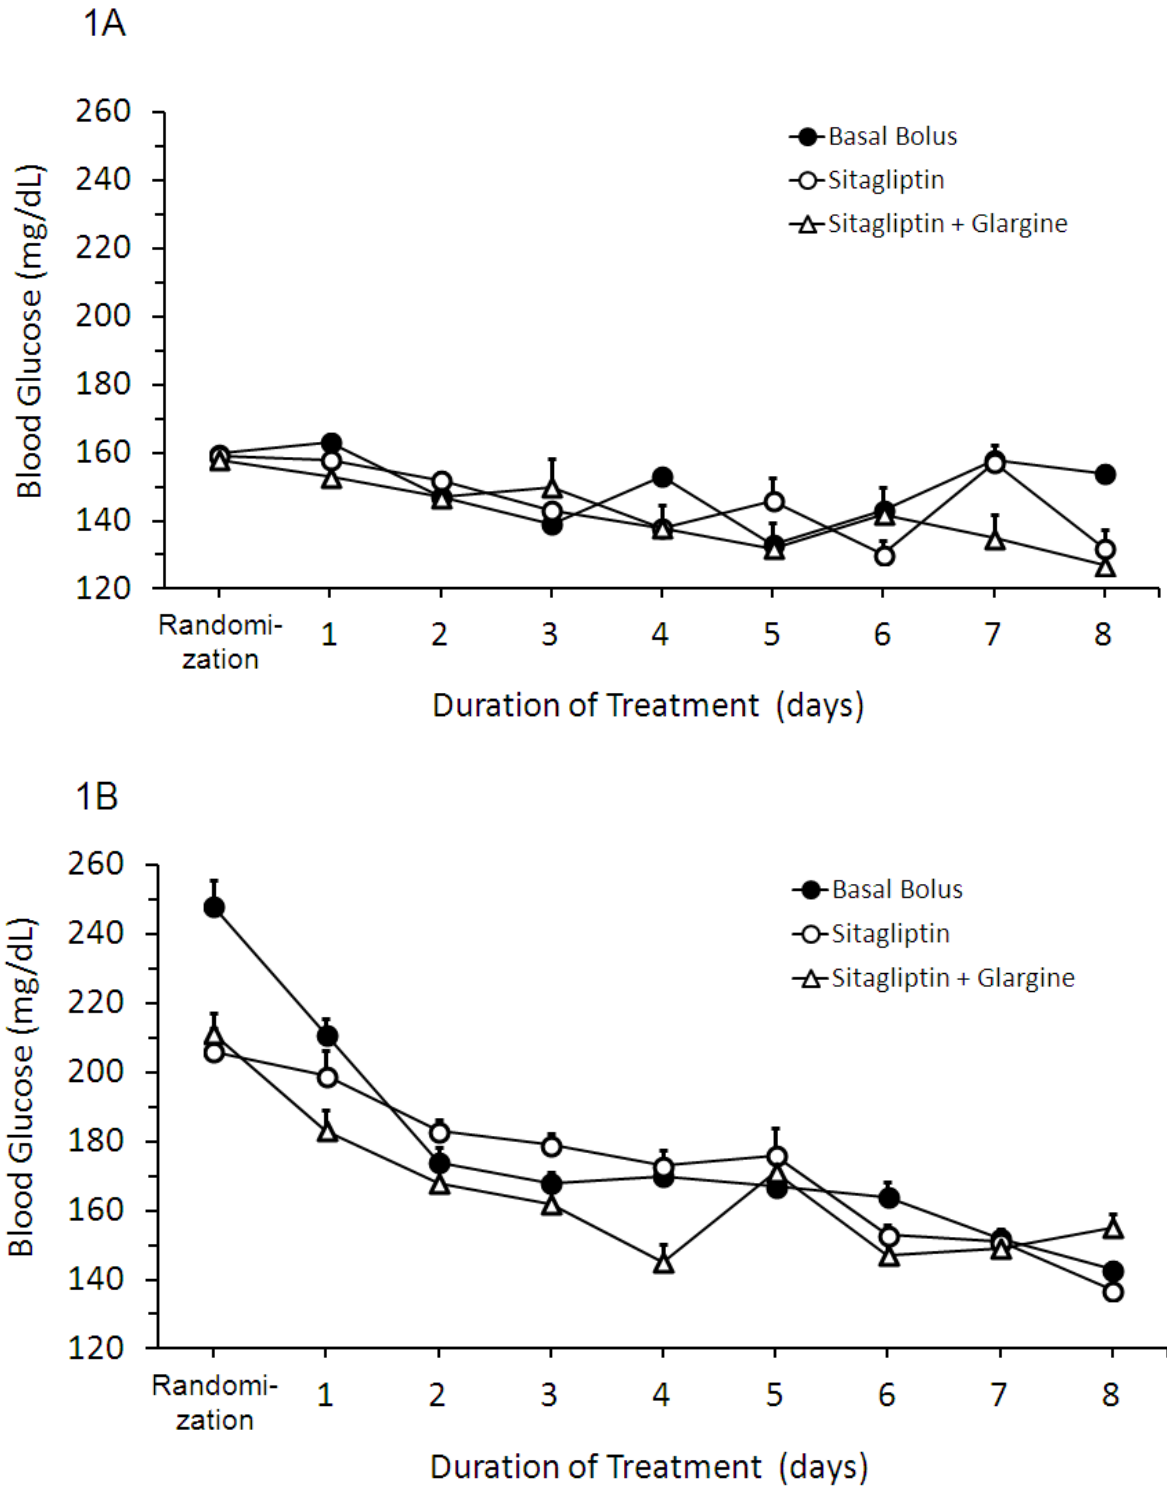

Supplement: supp_dc13-0277v130277_DC130277SupplementaryData.pdf [file supp_dc13-0277v130277_DC130277SupplementaryData.pdf]
